# Supplementary material
Source: PubMed Central journal article supplement (PMC6207460)

# Supplementary Information

## 1. Model Equations

The full mathematical models are described below. Note that the encoding of models in COPASI and SBML format are also included as supplementary data files.

### Model I

$$\begin{aligned} \frac{d([\text{CuCyt}] \cdot V_{\text{Vcyto}})}{d t} &= +V_{\text{Vpp}} \cdot \left( \frac{v_{\text{CcoA}} \cdot [\text{CuPP}]}{\text{KmCcoA} + [\text{CuPP}]} \right) \\ &\quad - V_{\text{Vcyto}} \cdot \left( \frac{v_{\text{CopA1}} \cdot [\text{CuCyt}]}{\text{KmCopA1} + [\text{CuCyt}]} \right) \\ &\quad - V_{\text{Vcyto}} \cdot \left( \frac{v_{\text{CusSystem}} \cdot [\text{CuCyt}]}{\text{KmCusSystem} + [\text{CuCyt}]} \right) \\ &\quad - V_{\text{Vcyto}} \cdot (\text{kasCuCytCP} \cdot [\text{CuCyt}] \cdot [\text{CytCP}]) \\ &\quad + V_{\text{Vcyto}} \cdot (\text{kdsCuCytCP} \cdot [\text{CuCytCP}]) \end{aligned}$$

$$\begin{aligned} \frac{d([\text{CuPP}] \cdot V_{\text{Vpp}})}{d t} &= +V_{\text{Vpp}} \cdot \left( \frac{v_{\text{OprC}} \cdot \text{CuExt0}}{\text{KmOprC} + \text{CuExt0}} \right) \\ &\quad - V_{\text{Vpp}} \cdot (\text{kasCuPPCP} \cdot [\text{CuPP}] \cdot [\text{PPCP}]) \\ &\quad - V_{\text{Vpp}} \cdot \left( \frac{v_{\text{CcoA}} \cdot [\text{CuPP}]}{\text{KmCcoA} + [\text{CuPP}]} \right) \\ &\quad + V_{\text{Vcyto}} \cdot \left( \frac{v_{\text{CopA1}} \cdot [\text{CuCyt}]}{\text{KmCopA1} + [\text{CuCyt}]} \right) \\ &\quad - V_{\text{Vpp}} \cdot \left( \frac{v_{\text{PcoB}} \cdot [\text{CuPP}]}{\text{KmPcoB} + [\text{CuPP}]} \right) \\ &\quad + V_{\text{Vpp}} \cdot (\text{kdsCuPPCP} \cdot [\text{CuPPCP}]) \end{aligned}$$

$$\begin{aligned} \frac{d([\text{CuCytCP}] \cdot V_{\text{Vcyto}})}{d t} &= +V_{\text{Vcyto}} \cdot (\text{kasCuCytCP} \cdot [\text{CuCyt}] \cdot [\text{CytCP}]) \\ &\quad - V_{\text{Vcyto}} \cdot (\text{kdsCuCytCP} \cdot [\text{CuCytCP}]) \end{aligned}$$

$$\begin{aligned} \frac{d([\text{CuPPCP}] \cdot V_{\text{Vpp}})}{d t} &= +V_{\text{Vpp}} \cdot (\text{kasCuPPCP} \cdot [\text{CuPP}] \cdot [\text{PPCP}]) \\ &\quad - V_{\text{Vpp}} \cdot (\text{kdsCuPPCP} \cdot [\text{CuPPCP}]) \end{aligned}$$

$$\begin{aligned} \frac{d([\text{PPCP}] \cdot V_{\text{Vpp}})}{d t} &= -V_{\text{Vpp}} \cdot (\text{kasCuPPCP} \cdot [\text{CuPP}] \cdot [\text{PPCP}]) \\ &\quad + V_{\text{Vpp}} \cdot (\text{kdsCuPPCP} \cdot [\text{CuPPCP}]) \end{aligned}$$

$$\begin{aligned} \frac{d([\text{CytCP}] \cdot V_{\text{Vcyto}})}{d t} &= -V_{\text{Vcyto}} \cdot (\text{kasCuCytCP} \cdot [\text{CuCyt}] \cdot [\text{CytCP}]) \\ &\quad + V_{\text{Vcyto}} \cdot (\text{kdsCuCytCP} \cdot [\text{CuCytCP}]) \end{aligned}$$

$$\text{"Total\_Cu (attomol/cell)" = "TotalCu\_PP (attomol/cell)" + "TotalCu\_Cyt (attomol/cell)"}$$

$$\text{"TotalCu\_Cyt (attomol/cell)" = } ([\text{CuCyt}] + [\text{CuCytCP}]) \cdot \text{Compartments[Vcyto].InitialVolume} \cdot 1\text{e18}$$

$$\text{"TotalCu\_PP (attomol/cell)" = } ([\text{CuPP}] + [\text{CuPPCP}]) \cdot \text{Compartments[Vpp].InitialVolume} \cdot 1\text{e18}$$

$$\text{TotalCu\_conc} = \frac{([\text{CuCyt}] + [\text{CuCytCP}]) \cdot \text{Compartments[Vcyto].InitialVolume} + ([\text{CuPP}] + [\text{CuPPCP}]) \cdot \text{Compartments[Vpp].InitialVolume}}{\text{Compartments[Vcyto].InitialVolume} + \text{Compartments[Vpp].InitialVolume}}$$

## Model II

$$\frac{d([\text{CuCyt}] \cdot V_{\text{vcyto}})}{dt} = +V_{\text{vpp}} \cdot \left( \frac{v\text{CcoA} \cdot [\text{CuPP}]}{\text{KmCcoA} + [\text{CuPP}]} \right) - V_{\text{vcyto}} \cdot \left( \frac{v\text{CopA1} \cdot [\text{CuCyt}]}{\text{KmCopA1} + [\text{CuCyt}]} \right) - V_{\text{vcyto}} \cdot \left( \frac{v\text{CusSystem} \cdot [\text{CuCyt}]}{\text{KmCusSystem} + [\text{CuCyt}]} \right) - V_{\text{vcyto}} \cdot (\text{kasCuCytCP} \cdot [\text{CuCyt}] \cdot [\text{CytCP}]) + V_{\text{vcyto}} \cdot (\text{kdsCuCytCP} \cdot [\text{CuCytCP}]) - V_{\text{vcyto}} \cdot \left( \frac{v\text{CopA2} \cdot [\text{CuCyt}]}{\text{KmCopA2} + [\text{CuCyt}]} \right)$$

$$\frac{d([\text{CuPP}] \cdot V_{\text{vpp}})}{dt} = +V_{\text{vpp}} \cdot \left( \frac{v\text{OprC} \cdot \text{CuExt0}}{\text{KmOprC} + \text{CuExt0}} \right) - V_{\text{vpp}} \cdot (\text{kasCuPPCP} \cdot [\text{CuPP}] \cdot [\text{PPCP}]) - V_{\text{vpp}} \cdot \left( \frac{v\text{CcoA} \cdot [\text{CuPP}]}{\text{KmCcoA} + [\text{CuPP}]} \right) + V_{\text{vcyto}} \cdot \left( \frac{v\text{CopA1} \cdot [\text{CuCyt}]}{\text{KmCopA1} + [\text{CuCyt}]} \right) - V_{\text{vpp}} \cdot \left( \frac{v\text{PcoB} \cdot [\text{CuPP}]}{\text{KmPcoB} + [\text{CuPP}]} \right) + V_{\text{vpp}} \cdot (\text{kdsCuPPCP} \cdot [\text{CuPPCP}]) + V_{\text{vcyto}} \cdot \left( \frac{v\text{CopA2} \cdot [\text{CuCyt}]}{\text{KmCopA2} + [\text{CuCyt}]} \right)$$

$$\frac{d([\text{CuCytCP}] \cdot V_{\text{vcyto}})}{dt} = +V_{\text{vcyto}} \cdot (\text{kasCuCytCP} \cdot [\text{CuCyt}] \cdot [\text{CytCP}]) - V_{\text{vcyto}} \cdot (\text{kdsCuCytCP} \cdot [\text{CuCytCP}])$$

$$\frac{d([\text{CuPPCP}] \cdot V_{\text{vpp}})}{dt} = +V_{\text{vpp}} \cdot (\text{kasCuPPCP} \cdot [\text{CuPP}] \cdot [\text{PPCP}]) - V_{\text{vpp}} \cdot (\text{kdsCuPPCP} \cdot [\text{CuPPCP}])$$

$$\frac{d([\text{PPCP}] \cdot V_{\text{vpp}})}{dt} = -V_{\text{vpp}} \cdot (\text{kasCuPPCP} \cdot [\text{CuPP}] \cdot [\text{PPCP}]) + V_{\text{vpp}} \cdot (\text{kdsCuPPCP} \cdot [\text{CuPPCP}])$$

$$\frac{d([\text{CytCP}] \cdot V_{\text{vcyto}})}{dt} = -V_{\text{vcyto}} \cdot (\text{kasCuCytCP} \cdot [\text{CuCyt}] \cdot [\text{CytCP}]) + V_{\text{vcyto}} \cdot (\text{kdsCuCytCP} \cdot [\text{CuCytCP}])$$

$$\text{"Total\_Cu (attomol/cell)" = "TotalCu\_PP (attomol/cell)" + "TotalCu\_Cyt (attomol/cell)"}$$

$$\text{"TotalCu\_Cyt (attomol/cell)" = } ([\text{CuCyt}] + [\text{CuCytCP}]) \cdot \text{Compartments[Vcyto].InitialVolume} \cdot 1\text{e18}$$

$$\text{"TotalCu\_PP (attomol/cell)" = } ([\text{CuPP}] + [\text{CuPPCP}]) \cdot \text{Compartments[Vpp].InitialVolume} \cdot 1\text{e18}$$

$$\text{TotalCu\_conc} = \frac{([\text{CuCyt}] + [\text{CuCytCP}]) \cdot \text{Compartments[Vcyto].InitialVolume} + ([\text{CuPP}] + [\text{CuPPCP}]) \cdot \text{Compartments[Vpp].InitialVolume}}{\text{Compartments[Vcyto].InitialVolume} + \text{Compartments[Vpp].InitialVolume}}$$

### Model III

$$\begin{aligned} \frac{d([\text{CuCyt}] \cdot V_{\text{cyto}})}{dt} &= +V_{\text{Vpp}} \cdot \left( \frac{v\text{CcoA} \cdot [\text{CuPP}]}{\text{KmCcoA} + [\text{CuPP}]} \right) \\ &\quad - V_{\text{Vcyto}} \cdot \left( \frac{v\text{CopA1} \cdot [\text{CuCyt}]}{\text{KmCopA1} + [\text{CuCyt}]} \right) \\ &\quad - V_{\text{Vcyto}} \cdot \left( \frac{v\text{CusSystem} \cdot [\text{CuCyt}]}{\text{KmCusSystem} + [\text{CuCyt}]} \right) \\ &\quad - V_{\text{Vcyto}} \cdot (\text{kasCuCytCP} \cdot [\text{CuCyt}] \cdot [\text{CytCP}]) \\ &\quad + V_{\text{Vcyto}} \cdot (\text{kdsCuCytCP} \cdot [\text{CuCytCP}]) \end{aligned}$$

$$\begin{aligned} \frac{d([\text{CuPP}] \cdot V_{\text{Vpp}})}{dt} &= +V_{\text{Vpp}} \cdot \left( \frac{v\text{OprC} \cdot \text{CuExt0}}{\text{KmOprC} + \text{CuExt0}} \right) \\ &\quad - V_{\text{Vpp}} \cdot (\text{kasCuPPCP} \cdot [\text{CuPP}] \cdot [\text{PPCP}]) \\ &\quad + V_{\text{Vpp}} \cdot (\text{kdPPCP} \cdot [\text{CuPPCP}]) \\ &\quad - V_{\text{Vpp}} \cdot \left( \frac{v\text{CcoA} \cdot [\text{CuPP}]}{\text{KmCcoA} + [\text{CuPP}]} \right) \\ &\quad + V_{\text{Vcyto}} \cdot \left( \frac{v\text{CopA1} \cdot [\text{CuCyt}]}{\text{KmCopA1} + [\text{CuCyt}]} \right) \\ &\quad - V_{\text{Vpp}} \cdot \left( \frac{v\text{PcoB} \cdot [\text{CuPP}]}{\text{KmPcoB} + [\text{CuPP}]} \right) \\ &\quad + V_{\text{Vpp}} \cdot (\text{kdsCuPPCP} \cdot [\text{CuPPCP}]) \end{aligned}$$

$$\begin{aligned} \frac{d([\text{CuCytCP}] \cdot V_{\text{Vcyto}})}{dt} &= +V_{\text{Vcyto}} \cdot (\text{kasCuCytCP} \cdot [\text{CuCyt}] \cdot [\text{CytCP}]) \\ &\quad - V_{\text{Vcyto}} \cdot (\text{kdsCuCytCP} \cdot [\text{CuCytCP}]) \end{aligned}$$

$$\begin{aligned} \frac{d([\text{CuPPCP}] \cdot V_{\text{Vpp}})}{dt} &= +V_{\text{Vpp}} \cdot (\text{kasCuPPCP} \cdot [\text{CuPP}] \cdot [\text{PPCP}]) \\ &\quad - V_{\text{Vpp}} \cdot (\text{kdPPCP} \cdot [\text{CuPPCP}]) \\ &\quad - V_{\text{Vpp}} \cdot (\text{kdsCuPPCP} \cdot [\text{CuPPCP}]) \end{aligned}$$

$$\begin{aligned} \frac{d([\text{PPCP}] \cdot V_{\text{Vpp}})}{dt} &= -V_{\text{Vpp}} \cdot (\text{kasCuPPCP} \cdot [\text{CuPP}] \cdot [\text{PPCP}]) \\ &\quad - V_{\text{Vpp}} \cdot (\text{kdPPCP} \cdot [\text{PPCP}]) \\ &\quad + V_{\text{Vpp}} \cdot (\text{kdsCuPPCP} \cdot [\text{CuPPCP}]) \\ &\quad + \left( \frac{V_{\text{Vpp}} \cdot \text{ksPPCP} \cdot [\text{CuCyt}]^{\text{hCuCytPPCP}}}{\text{KmCuCytPPCP}^{\text{hCuCytPPCP}} + [\text{CuCyt}]^{\text{hCuCytPPCP}}} \right) \end{aligned}$$

$$\begin{aligned} \frac{d([\text{CytCP}] \cdot V_{\text{Vcyto}})}{dt} &= -V_{\text{Vcyto}} \cdot (\text{kasCuCytCP} \cdot [\text{CuCyt}] \cdot [\text{CytCP}]) \\ &\quad + V_{\text{Vcyto}} \cdot (\text{kdsCuCytCP} \cdot [\text{CuCytCP}]) \end{aligned}$$

$$\text{"Total\_Cu (attomol/cell)" = "TotalCu\_PP (attomol/cell)" + "TotalCu\_Cyt (attomol/cell)"}$$

$$\text{"TotalCu\_Cyt (attomol/cell)" = } ([\text{CuCyt}] + [\text{CuCytCP}]) \cdot \text{Compartments[Vcyto].InitialVolume} \cdot 1\text{e18}$$

$$\text{"TotalCu\_PP (attomol/cell)" = } ([\text{CuPP}] + [\text{CuPPCP}]) \cdot \text{Compartments[Vpp].InitialVolume} \cdot 1\text{e18}$$

$$\text{TotalCu\_conc = } \frac{([\text{CuCyt}] + [\text{CuCytCP}]) \cdot \text{Compartments[Vcyto].InitialVolume} + ([\text{CuPP}] + [\text{CuPPCP}]) \cdot \text{Compartments[Vpp].InitialVolume}}{\text{Compartments[Vcyto].InitialVolume} + \text{Compartments[Vpp].InitialVolume}}$$

## 2. Identifiability analysis

Identifiability analysis was carried out for each of the models using profile likelihood analysis (Raue et al., 2009) using a previously described procedure (Schaber, 2012).

Briefly, hold each estimated parameter at a constant value around the best estimate (here we used  $\pm 1000$  fold) and estimate the rest of parameters by parameter estimation. The likelihood ratio is calculated using the following formula:

$$C_{LR} = SSR(p) \cdot \exp\left(\frac{\chi^2}{n}\right)$$

Where,  $\chi^2$  is the Chi-squared distribution and  $n$  is the number of data points. For Models I and II,  $n$  is 32 and for Model III it is 48.

Horizontal lines represent the level for 90% confidence intervals (solid line for identifiability of all parameters simultaneously, dashed line for identifiability of that parameter alone).

**Figure S1. Profile likelihood for Model I.**

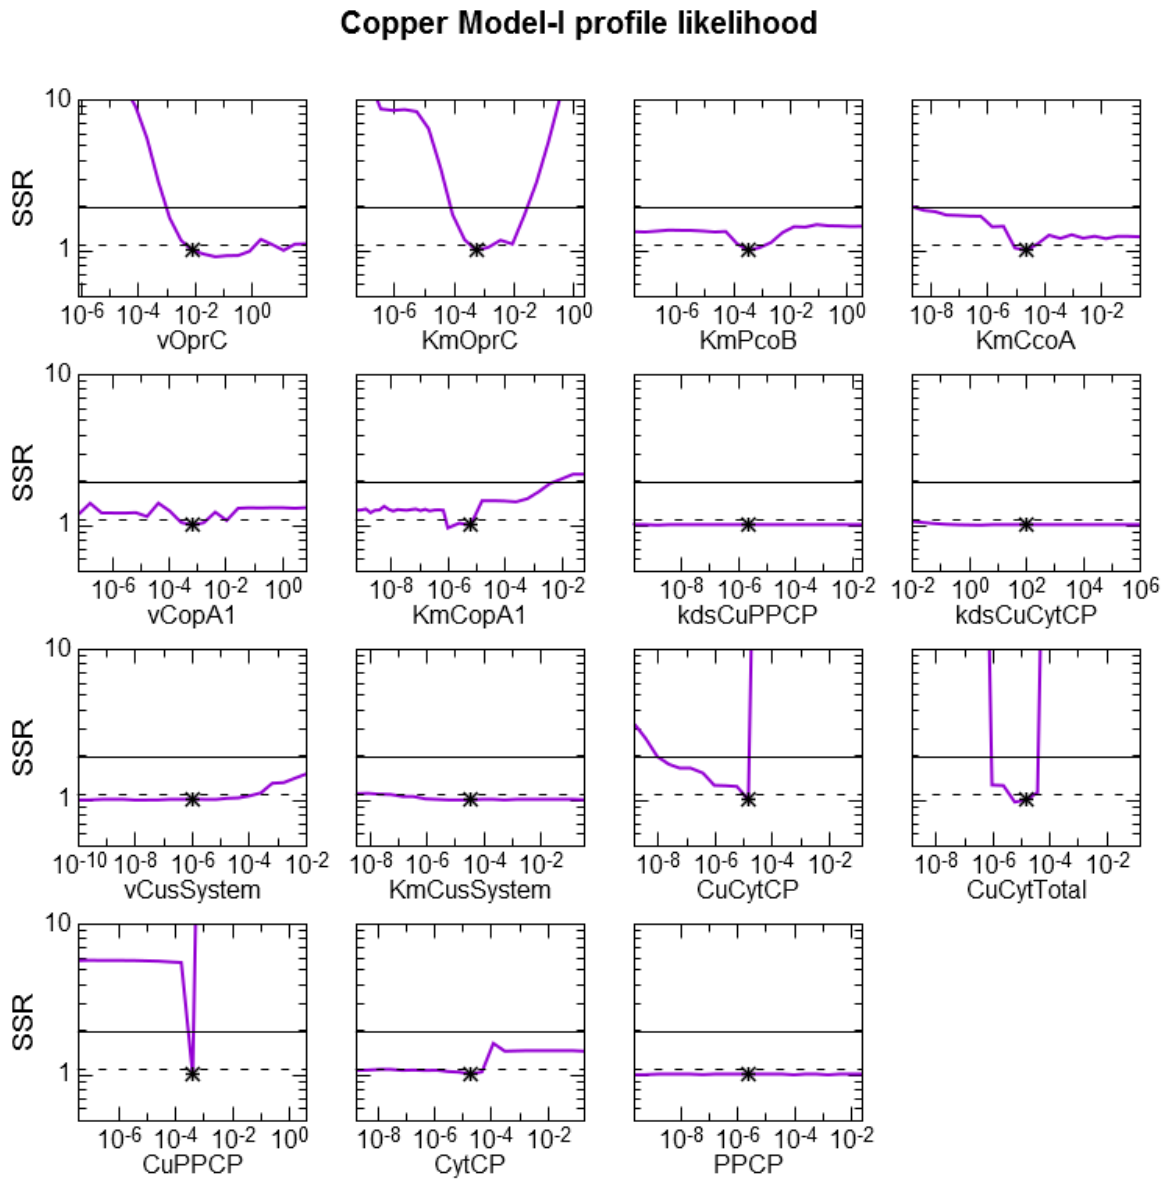

**Figure S2. Profile likelihood for Model II.**

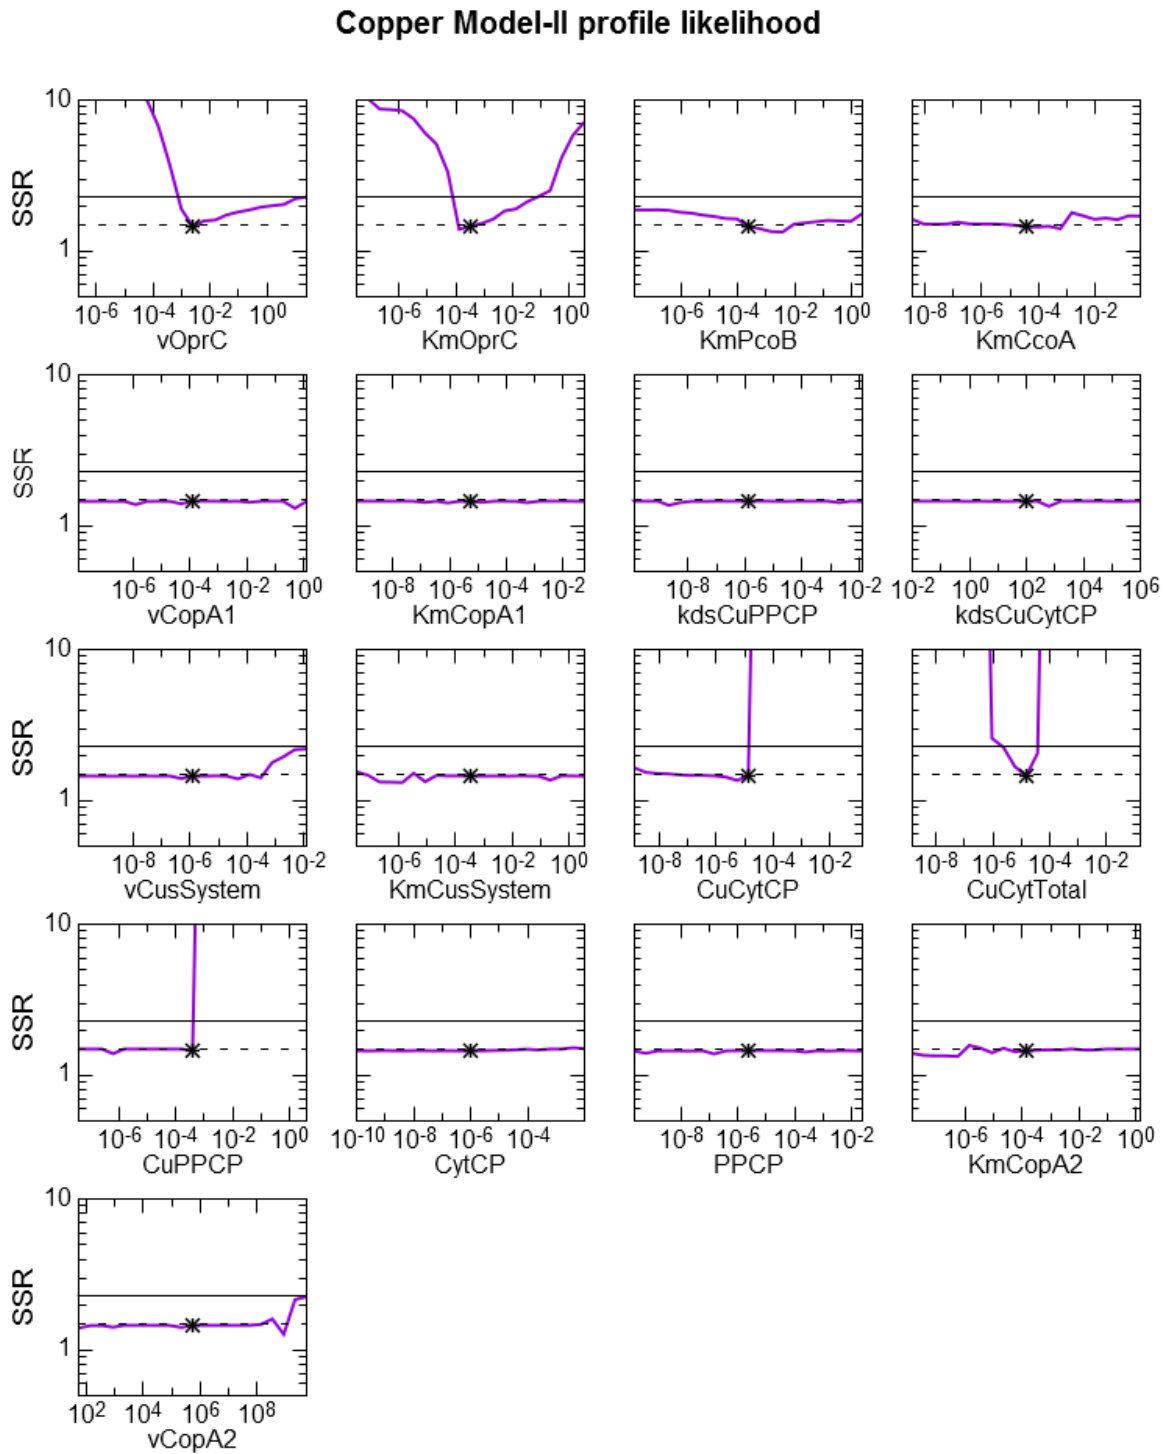

**Figure S3. Profile likelihood for Model III.**

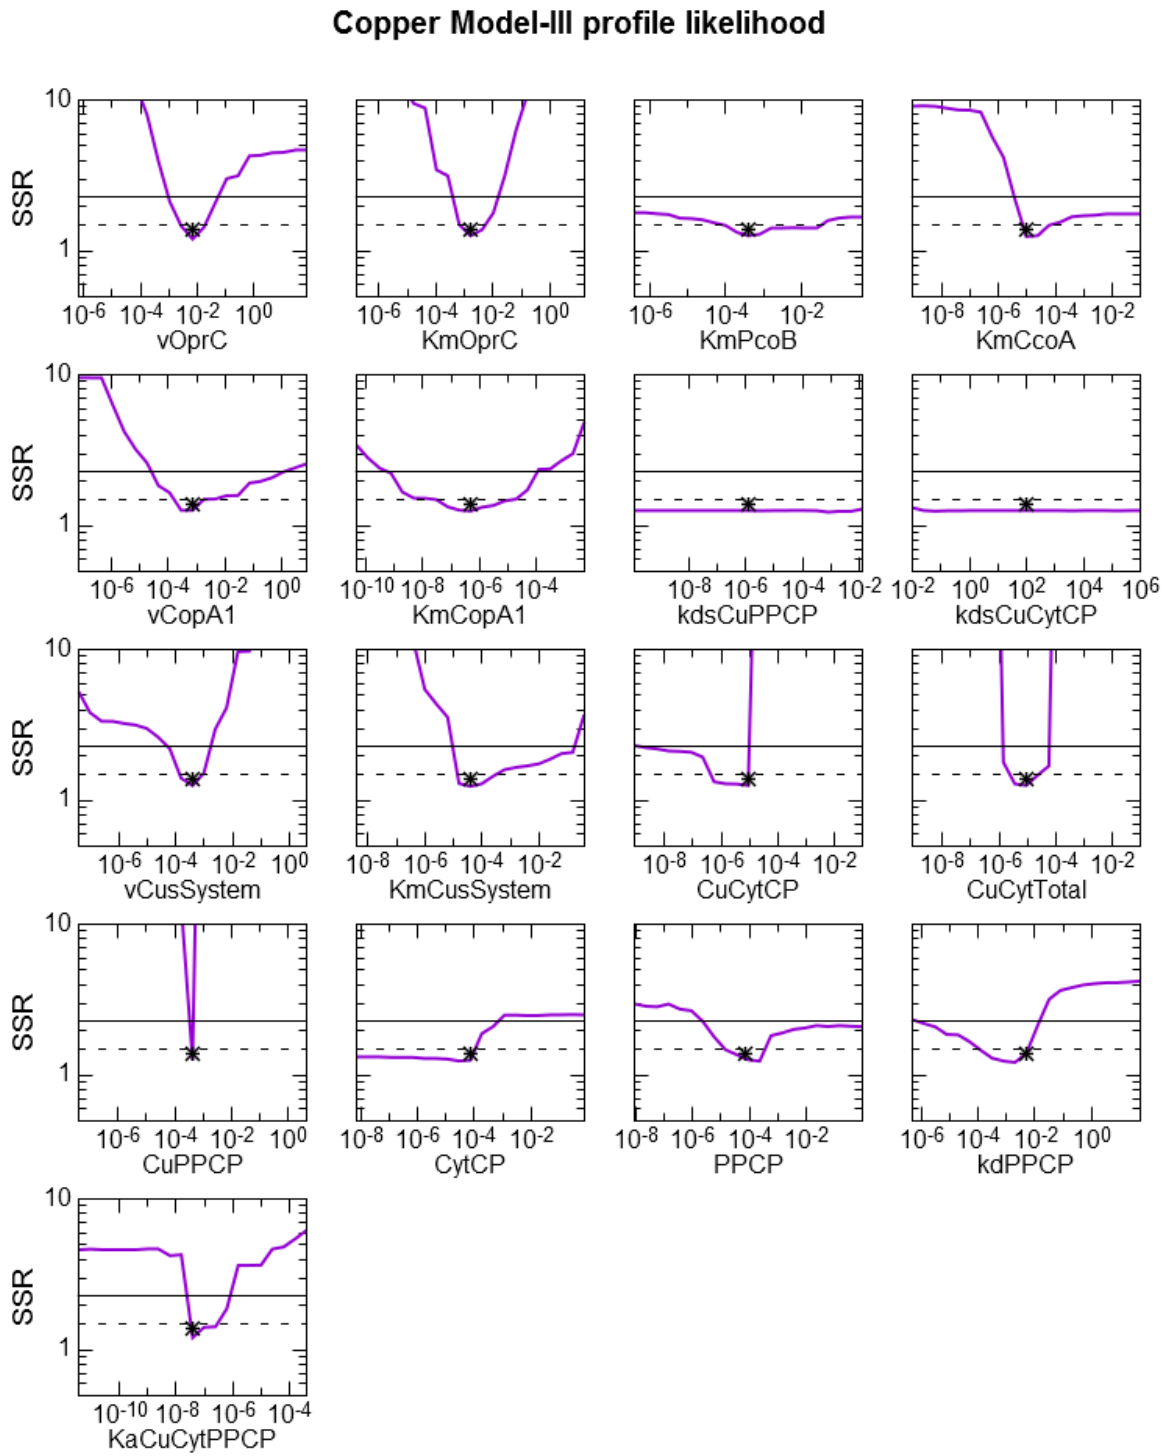

Supplement: NIHMS983023-supplement-Supp_Info.pdf [file NIHMS983023-supplement-Supp_Info.pdf]
